# Supplementary material
Source: Springer Nature journal article supplement (https://www.springermedizin.de/resource/supplementary/12885_2014_4469_MOESM3_ESM.pdf/9466486)

**A.**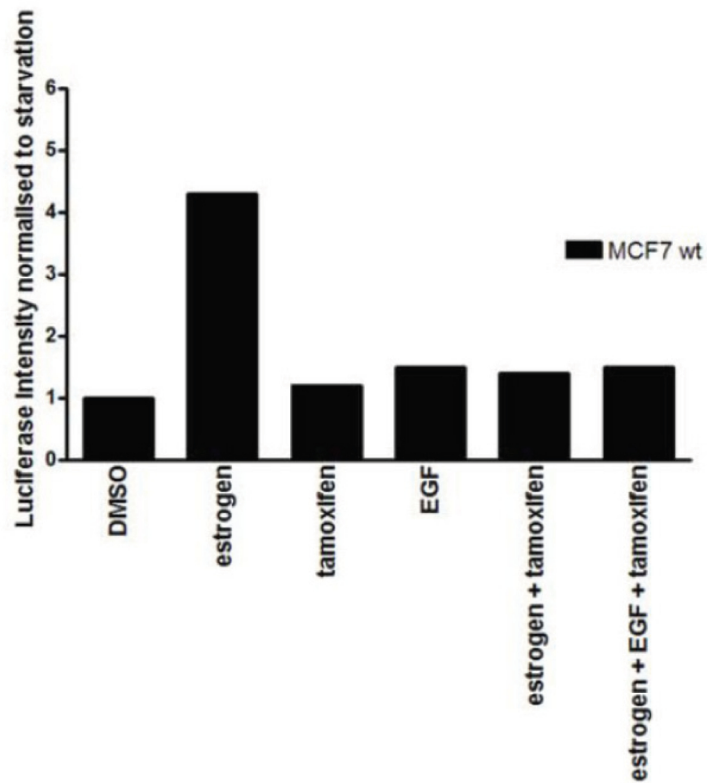**B.**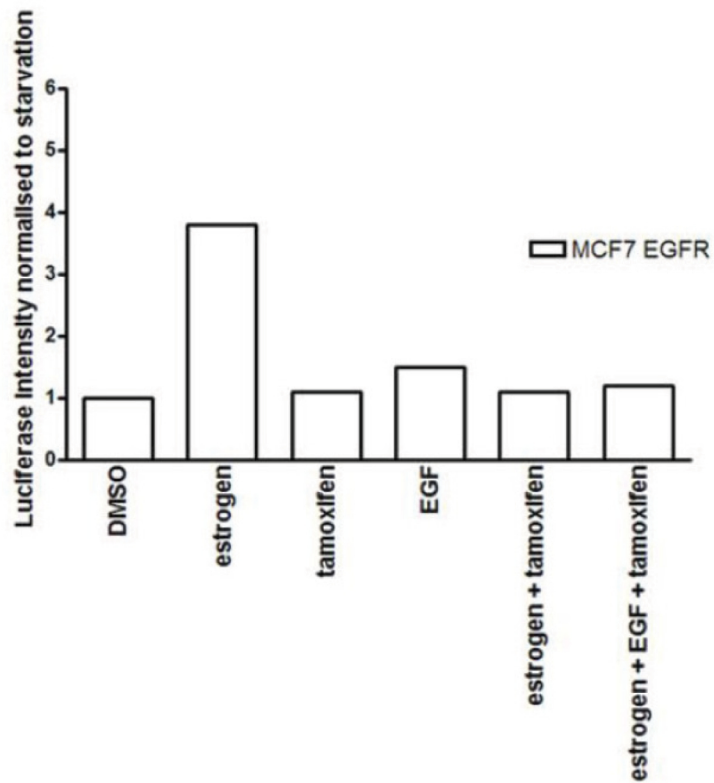

Supplement: MOESM3 [file 9466486]
